# Supplementary material for: Microbial Profiling of Potato-Associated Rhizosphere Bacteria under Bacteriophage Therapy
Source: MDPI journal article supplement (doi:10.3390/antibiotics11081117), 2022-08-18
Supplement: s1 [file s1]

**Table S1.** Some characteristics of the experimental soil and cattle manure (CM)

| Characteristics                                          | Soil              | CM                |
|----------------------------------------------------------|-------------------|-------------------|
| <u>Particle size distribution (%):</u>                   |                   |                   |
| Textural grade                                           | Sand              | -                 |
| pH                                                       | 8.01 <sup>†</sup> | 7.39 <sup>‡</sup> |
| EC <sub>e</sub> (dS m <sup>-1</sup> ) <sup>§</sup>       | 1.11              | 10.7              |
| <u>Soluble cations (meq l<sup>-1</sup>) <sup>§</sup></u> |                   |                   |
| Na <sup>+</sup>                                          | 3.8               | 12.0              |
| K <sup>+</sup>                                           | 1.54              | 9.91              |
| Ca <sup>2+</sup>                                         | 21.4              | 26.2              |
| Mg <sup>2+</sup>                                         | 9.3               | 6.0               |
| <u>Soluble anions (meq l<sup>-1</sup>) <sup>§</sup></u>  |                   |                   |
| Cl <sup>-</sup>                                          | 0.16              | 1.38              |
| HCO <sub>3</sub> <sup>-</sup>                            | 2.20              | 36.0              |
| SO <sub>4</sub> <sup>2-</sup>                            | 0.43              | 5.98              |
| CO <sub>3</sub> <sup>2-</sup>                            | 0.00              | 0.0               |
| Organic C (g kg <sup>-1</sup> )                          | 0.36              | 12.6              |
| Total N (g kg <sup>-1</sup> )                            | 0.21              | 11.6              |
| Available N (mg kg <sup>-1</sup> )                       | 1.29              | 79.7              |
| Available P (mg Kg <sup>-1</sup> )                       | 3.0               | 101               |

<sup>†</sup> In soil-water suspension (1:2.5)

<sup>‡</sup> In CM-water suspension (1:5)

<sup>§</sup> In soil and CM saturated extract Statistical analysis

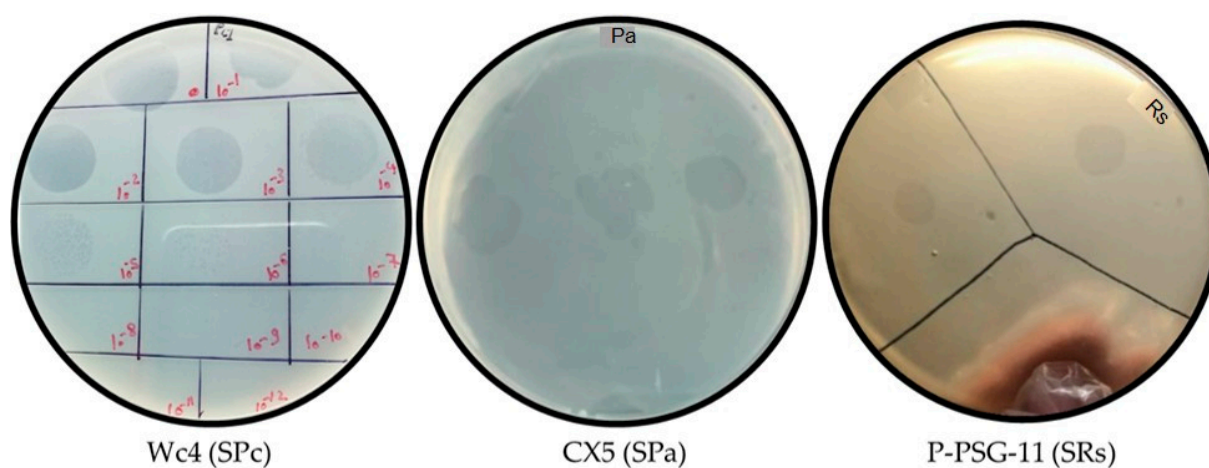**Figure S1.** Phage plaque assay

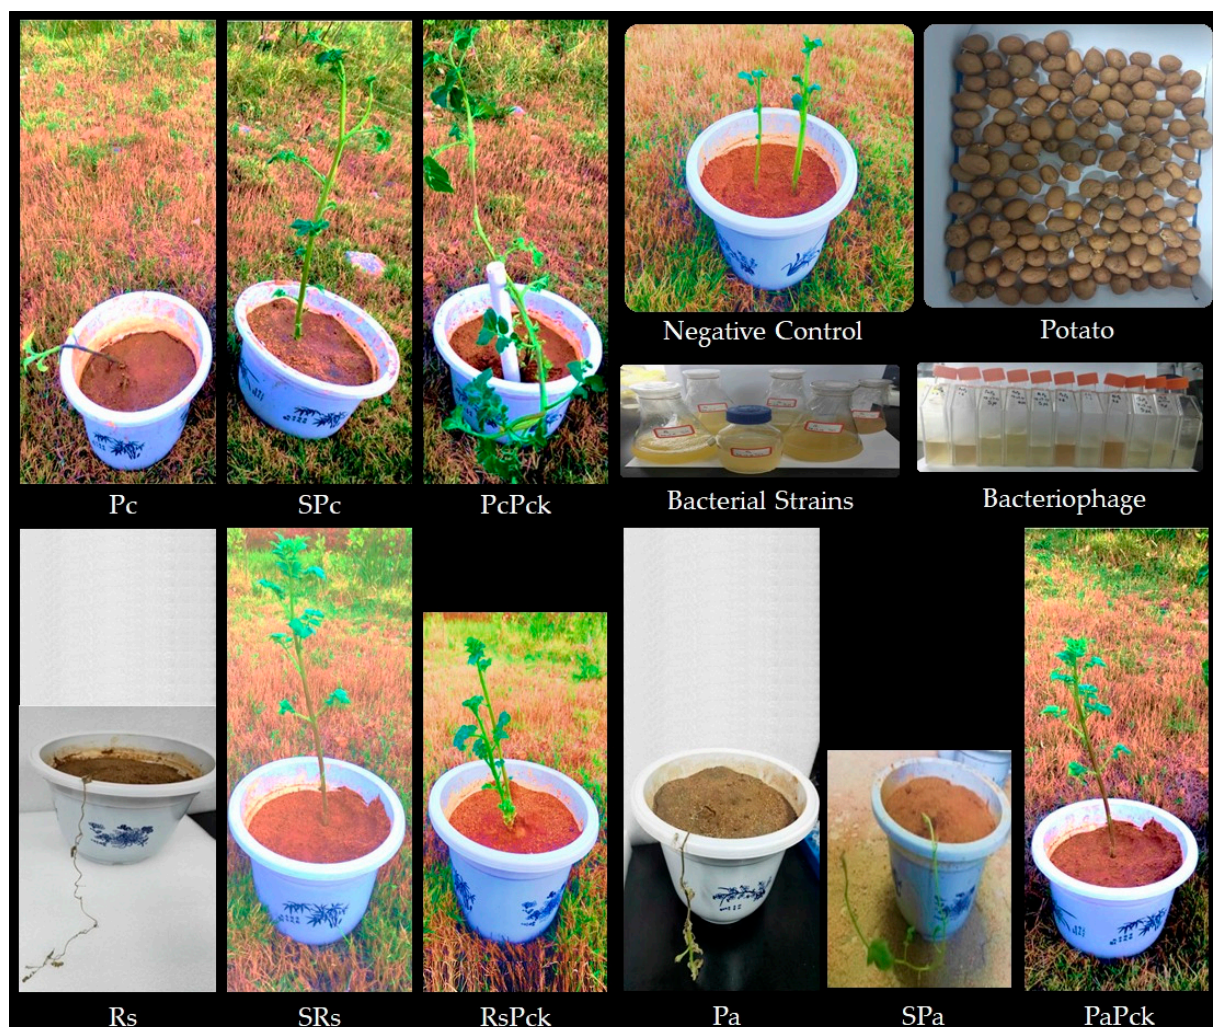

**Figure S2.** Phage biocontrol experiment
